# Supplementary material for: Sequence Analysis of the Segmental Duplication Responsible for Paris Sex-Ratio Drive in Drosophila simulans
Source: PubMed Central journal article supplement (PMC3276153; doi:10.1534/g3.111.000315), 2011-10-01
Supplement: supp_1.5.401_000315.pdf [file supp_1.5.401_000315.pdf]

**A**

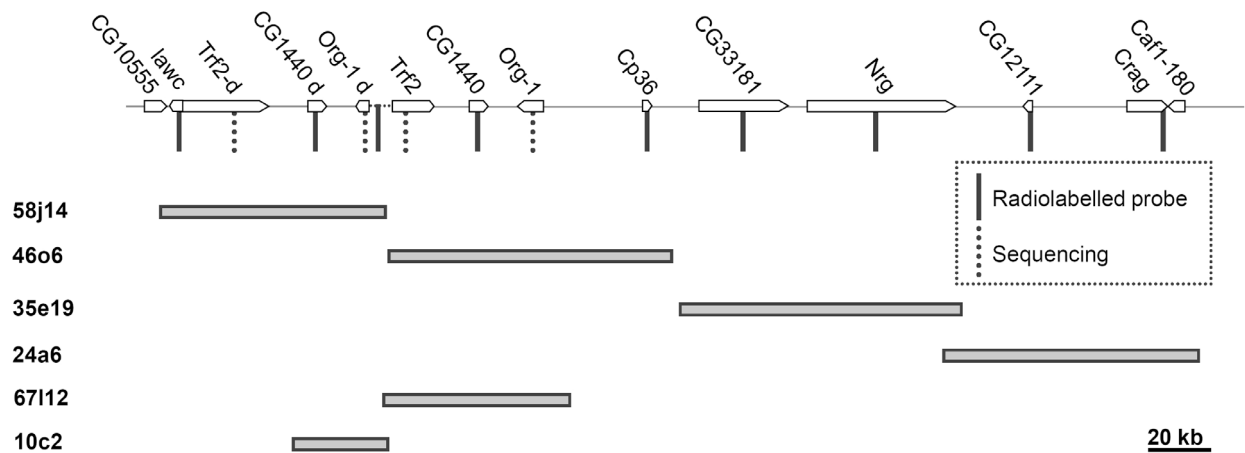

**B**

| Locus                | Name           | Primers                   | Size bp |
|----------------------|----------------|---------------------------|---------|
| Radiolabelled probes |                |                           |         |
| <i>lawc</i>          | DMCG32711ex1-1 | TGTGTGAGTCGCGATAAACG      | 738     |
|                      | DMCG32711_1_5  | TCAGCTCTGGTAGCGAAACA      |         |
| <i>CG1440</i>        | DMCG1440ex35-1 | GCGTTATGTTAAGCCGCATT      | 598     |
|                      | DMCG1440ex35-2 | GGCGTTCATCACCAGATAGC      |         |
| <i>IST-Trf2</i>      | inter43_44-1   | AACCGGTTATGATGCGAAAG      | 936     |
|                      | Inter43_44-2   | CCGTATAGCTCAACCGATTTG     |         |
| <i>Cp36</i>          | CP36-F1        | CAGACAGCGAGCAGTAGACG      | 802     |
|                      | CP36-R1        | GTGGAGCCTCGATCTTCTTG      |         |
| <i>CG33181</i>       | DMCG33181-3    | TTCTACGGAATGCAAACGTG      | 694     |
|                      | DMCG33181-4    | TTGAGCGATACAATCGAACG      |         |
| <i>Nrg</i>           | NRGintron1F    | GCAGTGCAGAAAGCAAAGGT      | 350     |
|                      | NRGintron1R    | CCGGTTGTTTGGTGATTCTT      |         |
| <i>CG12111</i>       | DSC12111-F1    | TCTGCTGTTAATCCTGACGA      | 614     |
|                      | DSC12111-R1    | TACCACTTAATGTAGGTGAACTTGA |         |
| <i>Crag</i>          | DMCRAG7        | GTACAGATCGAACGGCAGGT      | 805     |
|                      | DMCRAG8        | CATACTCGCGATGGAATGTG      |         |
| Sequencing probes    |                |                           |         |
| <i>Trf2</i>          | DMTRF2-1       | GCCATCCATACACCACTGC       | 530     |
|                      | DMTRF2-2       | GAACGTTGCTTGCGGAAA        |         |
| <i>Org-1</i>         | OrgF1          | AGCCAATTTGCACTTTCAT       | 1054    |
|                      | OrgR1          | GTGCCATCACATCCCGAAAG      |         |

**Figure S1** Selection of the clones used to sequence the *sex-ratio* region on  $X^{SR6}$ . (A): Schematic representation of the *sex-ratio* region on the X chromosome and position of the clones. For the sake of simplicity, we only represented the genes used to design probes for the selection of clones and two genes adjacent to the region under study. The open boxes represent the genes. The grey boxes represent the clones, with their names on the left. The vertical bars show the fragments used as probes to position the clones on the X chromosome (see materials and methods), the dotted vertical lines represent the fragments that were sequenced to discriminate between the proximal and distal copies of the duplication. (B): PCR primers to produce the fragments used as probes (ordered from left to right).

*D. melanogaster*

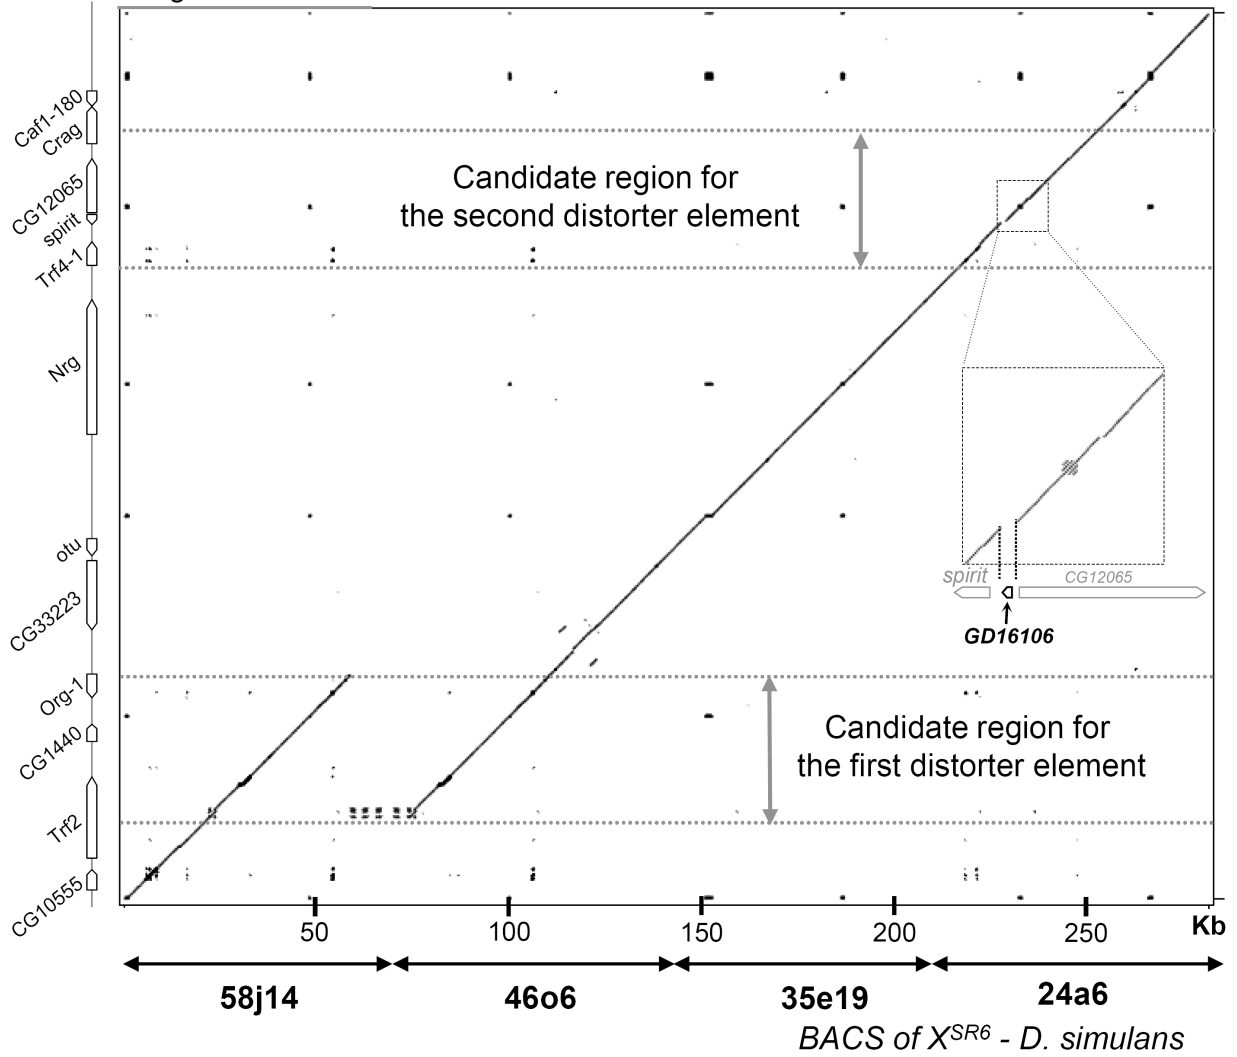

**Figure S2** Dot plot comparison of the *sex-ratio* region on the  $X^{SR6}$  chromosome of *D. simulans* (below) with the homologous region in *D. melanogaster* (left). Boxes along the vertical axis represent the genes annotated in *D. melanogaster* genome. The limits of the candidate region for the second element involved in drive are those determined in Montchamp-Moreau *et al* (2006).

| DDSA traces interpretation |          |                       |                                       |
|----------------------------|----------|-----------------------|---------------------------------------|
| Site                       | Position | DDSA type of trace    | Deduction of the neo-synthesized copy |
| 1                          | 5838     | Tandem repeat         | Proximal copy (4606)                  |
| 2                          | 5949     | Micro-homology traces | Proximal copy (4606)                  |
| 3                          | 6198     | Tandem repeat         | Distal copy (58j14)                   |
| 4                          | 6992     | Micro-homology traces | Proximal copy (4606)                  |
| 5                          | 8787     | Micro-homology traces | Proximal copy (4606)                  |

| Legends:              |
|-----------------------|
| tandem repeat         |
| micro-homology traces |

**Site 1: Position: 5838 bp**

```

XSR6d-58j14  CCGGCATTTATCAAACGGCAATGTCG-----GTGGAATCTTTAACTAGAAACAAC
XSR6p-4606  CCGGCATTTATCAAACGGCAATGTCGTGGAAATCGTGTGGAATCTTTAACTAGAAACAAC
*****
Dsim        CCGGCATTTATCAAACGGCAATGTCG-----GTGGAATCTTTAACTAGAAACAAC
Dsec       CCGGCATTTATCAAACGGCAATGTCG-----GTGGAATCTTTAACTAGAAACAAC
Dmel       GAGGCATTTATCAAATCGGCAATGTCG-----GGGGAATCTTCAACTAGAAACAAC

```

**Site 2: Position: 5949 bp**

```

XSR6d-58j14  ATAGATCTCTTTGGCATTAAAT-----GAGTGAAGCTCCTAAATGTACATATGCAATAT
XSR6p-4606  ATAGATCTCTTTGGC-----TCCATAATGTACATATGCAATAT
*****
Dsim        ATAGATCTCTTTGGCATTAAAT-----GAGTGAAGCTCCTAAATGTACATATGCAATAT
Dsec       ATAGATCTCTTTGGCATTAAATTTAAATGAGTGAAGCTCCTAAATGTACATATGCAATAT
Dmel       ATAGATCTTTTTGGCATTAAAT-----GAGTGAAGCTCCTAAACATACATATGCAATAT
Dyak       ATAGACCTTTTTGGTATTAAAT-----GAGAGAAGCTCCTAAATGTACATTTGAAATAT

```

**Site 3: Position: 6198 bp**

```

XSR6d-58j14  TCGATGTTGGTGCATAACTGTTGTTGTTGCATAACTGTTGTTGTTGCTGTTGCTCGATTT
XSR6p-4606  TCGATGTTGGTGCATAACTGTTGTTGTTGCTGTTGCTCGATTT
*****
Dsec       TCGATGTTGGTGCATAACTGTTGTTGTTGCTGTTGCTCGATTT
Dsim       TCGATGTTGGTGCATAACTGTTGTTGTTGCTGTTGCTCGATTT
Dmel       TCGATGTTGGTGCATAACTGTTGTTGTTGCTGTTGCTCGATTT

```

**Site 4: Position: 6992 bp**

```

XSR6d-58j14  AATTTGCGTGTTCTTATTTTCCCAAATGTCAACTTTTCCAAATTATTTATTTACTTTTAT
XSR6p-4606  AATTTACGTGTTCTTATTTTCCCAA-----TTATTTATTTACTTTTAT
*****
Dsim-a     AATTTGCGTGTTCTTATTTTCCCAAATTTCAACTTTTCCAAATTATTTATTTACTTTTAT
Dsim-b     AATTTGCGTGTTCTTATTTTCCCAAATGTCAACTTTTCTAATTATTTATTTACTTTTAT
Dsec       AATTTGCATGTTCTTATTTTCCCAAATGTCAACTTTTCCGATTATTTATTTACTTTTAT
Dmel       AATTTGCATGTTTCTATTTTCCCAAATGTCAACTTTACGA-----TTATTAACTTTAT

```

**Site 5: Position: 8787 bp**

```

XSR6d-58j14  GAGTACCAGGATTCAAATCACGAGTACCAGGACTTGAATCACGAGTATCAGGACTCAACA
XSR6p-4606  GAGTACCAGGATTCAA-----ATCAGGAGTATCAGGACTCAACA
*****
Dsim       GAGTACCAGGATTCAAATCACGAGTACCAGGACTTGAATCACGAGTATCAGGACTCAACA

```

**Figure S3** Signatures of the DDSA model. Several traces of the DDSA model have been detected when aligning the duplicated fragments according to Fiston-Lavier *et al* (2007): XSR6d-58j14 = distal copy on X<sup>SR6</sup>, XSR6p-58j14 = proximal copy on X<sup>SR6</sup>. The stars show the position identical between the copies. Homologous sequences in other species were found in flybase. Dsim: *D. simulans*, Dsec: *D. sechellia*, Dmel: *D. melanogaster*, and Dyak: *D. yakuba*. The positions of sites correspond to those in abscissa of Figure 2.

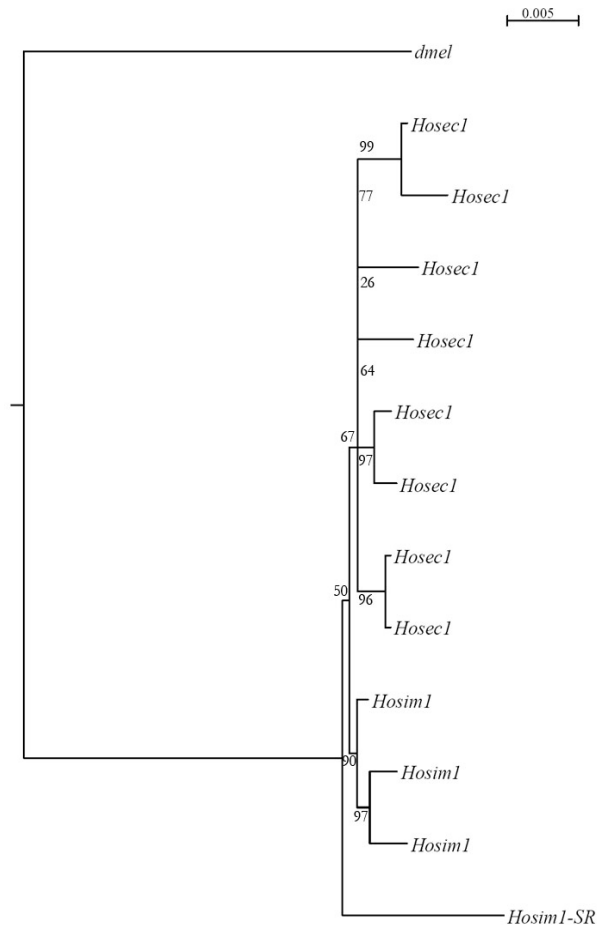

**Figure S4** Maximum likelihood tree of *Hosim1* homologous sequences (HKY85 model) rooted with *D. melanogaster* sequence (*dmel*). *Hosec1* : sequence found in *D. sechellia* (DE FREITAS ORTIZ and LORETO 2009). Numbers are the bootstrap values (100 repetitions).

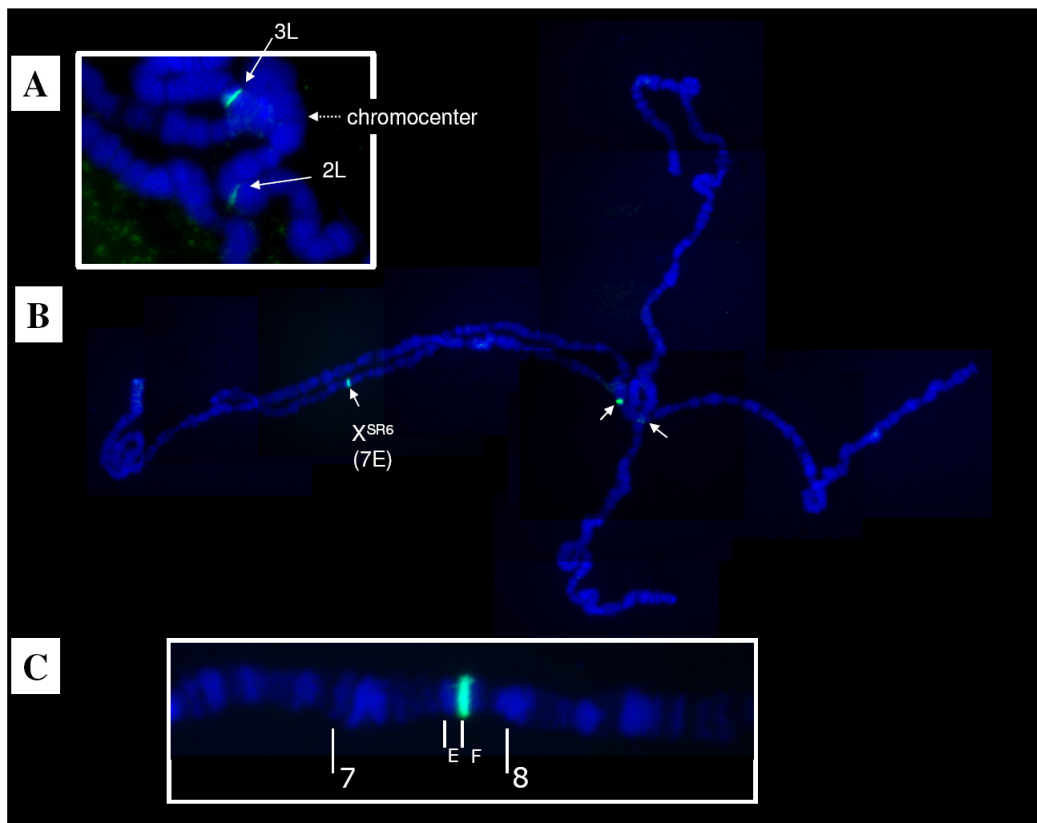

**Figure S5** Visualization of *Hosim1* insertion sites by *in situ* hybridization on polytene chromosomes. (A) Two autosomal pericentromeric sites are visible in  $(X^{ST8})_{ST8}$  males (3L and 2L arms). (B) In  $(X^{SR6})_{ST8}$  males, an additional signal is visible on the  $X^{SR6}$  chromosome. It co-localizes with the supplementary band induced by the duplication (see Figure 2 in Montchamp-Moreau *et al.*, 2006). C. Focus on the  $X^{SR6}$  specific insertion site.

A

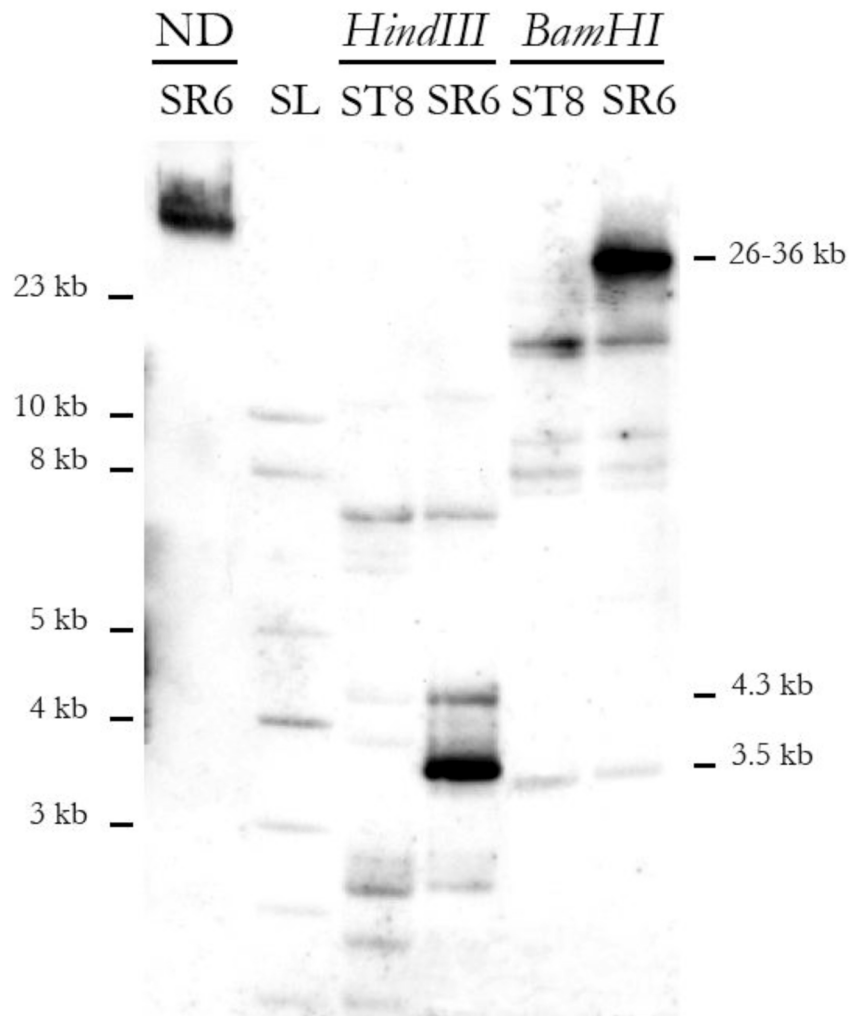

B

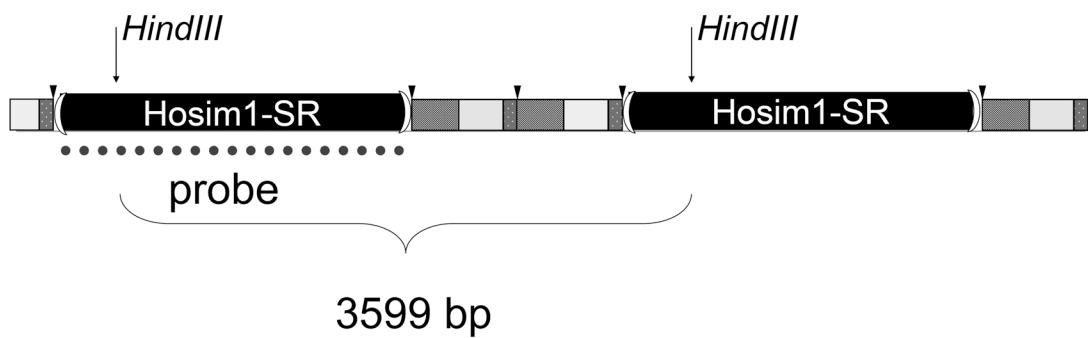

**Figure S6** Control of the organization of the junction region. (A) Southern blot with DNA of  $(X^{SR6})_{ST8}$  males digested with *BamHI* or *HindIII* and probed with *Hosim1-SR*. ND: Non Digested. ST8=  $(X^{ST8})_{ST8}$  males, SR6 =  $(X^{SR6})_{ST8}$  males. SL = Smart Ladder. (B) Position of *Hosim1* probe and *HindIII* sites in the basic module of the junction.

```

Hosim1-3L GAGTGCCTAAATGCAAACTACTGCAAAACTGTGCTTAGTGTGGTGGTGGATCGCAAGGAAACTTATCGCGTCACCTTAAAAATAAGCACCCAGCAGCTTTG
Hosim1-2L .....
Hosim1-U .....
Hosim1-SR .....
cDNA .....

Hosim1-3L GAGGAAACAAAGCGCCAAACCAATGAAAGCCGACAGGAAGCAAAATGTAACATAATATTTGATTTATTCATTTAAGTAGGCTTACTAAATTCCTGATT
Hosim1-2L .....
Hosim1-U .....
Hosim1-SR .....
cDNA .....

Hosim1-3L CTTTTAACATAGACTCCTCAGATAATTGGACCCCAACAGCAAGTAATAACTTCGTTCAITTCACGACC---GGCTGCCGGGAAAGCTGAGAAAA
Hosim1-2L .....
Hosim1-U .....
Hosim1-SR .....
cDNA .....

```

**Figure S7** Identification of an intron in *Hosim1-SR*. The shorter cDNA fragment of Figure 8 have been sequenced and aligned with the sequences of *Hosim1* (DE FREITAS ORTIZ and LORETO 2009) and *Hosim1-SR* . Comparing the sequences shows that the sequenced cDNA came from *Hosim1-SR* form. The part highlighted in yellow shows an intron delimited by the characteristic GT-AG nucleotides, which is close to the deletion of 79nt specific of *Hosim1-SR* (Figure 5).

**Table S1 PCR primers used in the study.**

| Locus                       | Name                                | Primers                                                    | Used for                                  | DNA size (bp)                            | cDNA size (bp)                                           |
|-----------------------------|-------------------------------------|------------------------------------------------------------|-------------------------------------------|------------------------------------------|----------------------------------------------------------|
| <i>GAPDH</i>                | GAPDH-q1                            | AAGGCTGGCATTTCGCTGAACG<br>AATTGCGCCCTTGCGGATTATG           | quantification                            | 198                                      | 198                                                      |
|                             | hAT1-F<br>hAT1-R                    | CGCCCCGGATACAAGATGCCCA<br>CTGCAACAAGTGCAGCAACACA           | probe for FISH                            | 850                                      | 850                                                      |
| <i>Hosim1</i>               | Hosim1-q1-F<br>Hosim1-q1-R<br>(c)   | GGAGCTGGCATCTGCAGTTTGT<br>CTGCTCAACGAATGCCTCGCA            | quantification                            | 148                                      | 148                                                      |
|                             | Hosim1ST-q-F<br>Hosim1ST-q-R<br>(b) | TTCACCAAAGTGAACGAACG<br>TAAGTGAACAACGAACGAACG              | quantification                            | 150                                      | 150                                                      |
|                             | hAT2-F<br>hAT2-R<br>(a)             | ATGGCTTCAAACGAAAGCA<br>CATTATCGGAAACACAGCA                 | Length<br>polymorphism                    | Hosim1-ST :<br>784<br>Hosim1-SR :<br>699 | Hosim1-ST :<br>784 and 717<br>Hosim1-SR :<br>699 and 632 |
|                             | Hosimbam-F<br>Hosimbam-R            | GGATCCCCGAGTGCAGGGAAGTT<br>GGATCCGGCACAGAAAATACGCAAGGAAGCA | probe for<br>Southern blot                |                                          |                                                          |
| <i>RPL17</i>                | RPL17-q2-F<br>RPL17-q2-R            | CCCTCCTTTTCGTTTTCGTT<br>GTGTTGTTCGGCACAGTTCAT              | quantification                            | 345                                      | 161                                                      |
| <i>RPII140</i>              | RPII140-q1-F<br>RPII140-q1-R        | ATGGTGGCTTGCGTTTCGGTG<br>ATTGTTGCGCAGATTGGCGATGG           | quantification                            | 158                                      | 158                                                      |
| <i>light</i>                | Light410-F<br>Light535-R            | CCGATTCCAAAGCTCACATT<br>TTGACAAAACACTGCCTTCG               | quantification                            | 194                                      | 126                                                      |
| <i>Trf2</i>                 | DMTRF2-1<br>DMTRF2-2                | GCCATCCATACACCACTGC<br>GAACGTTGCTTGCGGAAA                  | control of cDNA                           | 526                                      | 462                                                      |
| <i>IST</i>                  | motif1-q2-F<br>motif1-q2-R          | AGTTGCCTTTGAGTTTTCTG<br>ACTGATTTTGTTCACCTGACT              | expression of<br><i>rISTs</i>             | 79                                       | 79                                                       |
| junction<br>distal<br>(a)   | jct-F<br>jct-orgLongR2              | GTCCTTGCAGGCAGACAAA<br>TGCGCACTCGGGGTCACGAT                | control of<br>duplication<br>organization | 757                                      | -                                                        |
| junction<br>proximal<br>(c) | hosimSR1768-F<br>jctTRF2-R          | ACATCAGTTCCTTGCGAACGCCT<br>AGAGAGTACGTGCCAGTGTGTA          | control of<br>duplication<br>organization | 1907                                     | -                                                        |
| junction<br>internal<br>(b) | Jct-oranbleu-F<br>hosimSR247-R      | AGGGTACGGCAACGGTCACA<br>TCCTCAAAGCTGCTGGGTGC               | control of<br>duplication<br>organization | 627                                      | -                                                        |
