# Supplementary material for: Sequence Analysis of the Segmental Duplication Responsible for Paris Sex-Ratio Drive in Drosophila simulans
Source: PubMed Central journal article supplement (PMC3276153; doi:10.1534/g3.111.000315), 2011-10-01
Supplement: supp_1.5.401_FigureS1.pdf [file supp_1.5.401_FigureS1.pdf]

**A**

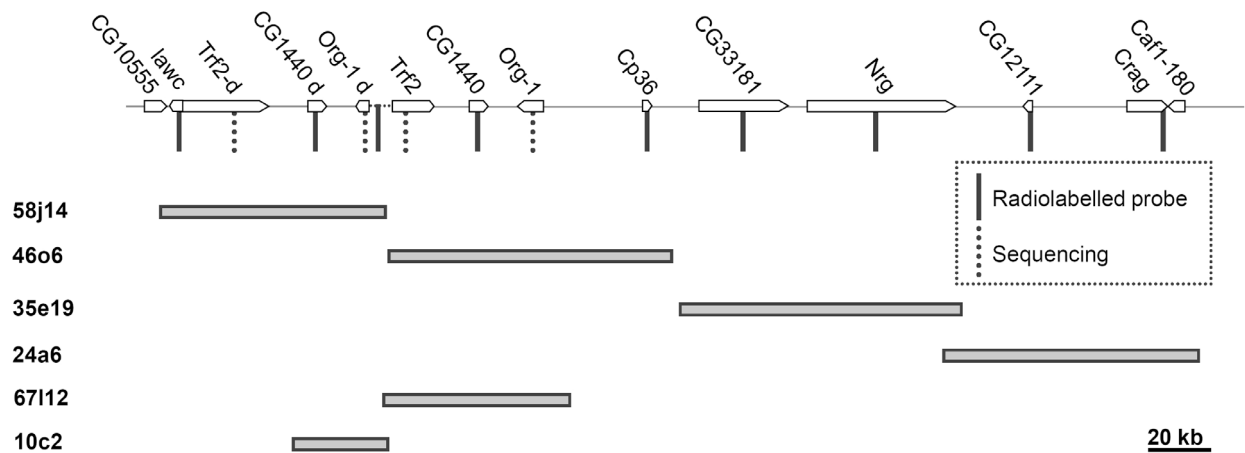

**B**

| Locus                | Name           | Primers                   | Size bp |
|----------------------|----------------|---------------------------|---------|
| Radiolabelled probes |                |                           |         |
| <i>lawc</i>          | DMCG32711ex1-1 | TGTGTGAGTCGCGATAAACG      | 738     |
|                      | DMCG32711_1_5  | TCAGCTCTGGTAGCGAAACA      |         |
| <i>CG1440</i>        | DMCG1440ex35-1 | GCGTTATGTTAAGCCGCATT      | 598     |
|                      | DMCG1440ex35-2 | GGCGTTCATCACCAGATAGC      |         |
| <i>IST-Trf2</i>      | inter43_44-1   | AACCGGTTATGATGCGAAAG      | 936     |
|                      | Inter43_44-2   | CCGTATAGCTCAACCGATTTG     |         |
| <i>Cp36</i>          | CP36-F1        | CAGACAGCGAGCAGTAGACG      | 802     |
|                      | CP36-R1        | GTGGAGCCTCGATCTTCTTG      |         |
| <i>CG33181</i>       | DMCG33181-3    | TTCTACGGAATGCAAACGTG      | 694     |
|                      | DMCG33181-4    | TTGAGCGATACAATCGAACG      |         |
| <i>Nrg</i>           | NRGintron1F    | GCAGTGCAGAAAGCAAAGGT      | 350     |
|                      | NRGintron1R    | CCGTTGTTTGGTGATTCTT       |         |
| <i>CG12111</i>       | DSC12111-F1    | TCTGCTGTTAATCCTGACGA      | 614     |
|                      | DSC12111-R1    | TACCACTTAATGTAGGTGAACTTGA |         |
| <i>Crag</i>          | DMCRAG7        | GTACAGATCGAACGGCAGGT      | 805     |
|                      | DMCRAG8        | CATACTCGCGATGGAATGTG      |         |
| Sequencing probes    |                |                           |         |
| <i>Trf2</i>          | DMTRF2-1       | GCCATCCATACACCACTGC       | 530     |
|                      | DMTRF2-2       | GAACGTTGCTTGCGGAAA        |         |
| <i>Org-1</i>         | OrgF1          | AGCCAATTTGCACTTTCAT       | 1054    |
|                      | OrgR1          | GTGCCATCACATCCCGAAAG      |         |

**Figure S1** Selection of the clones used to sequence the *sex-ratio* region on  $X^{SR6}$ . (A): Schematic representation of the *sex-ratio* region on the X chromosome and position of the clones. For the sake of simplicity, we only represented the genes used to design probes for the selection of clones and two genes adjacent to the region under study. The open boxes represent the genes. The grey boxes represent the clones, with their names on the left. The vertical bars show the fragments used as probes to position the clones on the X chromosome (see materials and methods), the dotted vertical lines represent the fragments that were sequenced to discriminate between the proximal and distal copies of the duplication. (B): PCR primers to produce the fragments used as probes (ordered from left to right).
