# Supplementary material for: Sequence Analysis of the Segmental Duplication Responsible for Paris Sex-Ratio Drive in Drosophila simulans
Source: PubMed Central journal article supplement (PMC3276153; doi:10.1534/g3.111.000315), 2011-10-01
Supplement: supp_1.5.401_FigureS2.pdf [file supp_1.5.401_FigureS2.pdf]

*D. melanogaster*

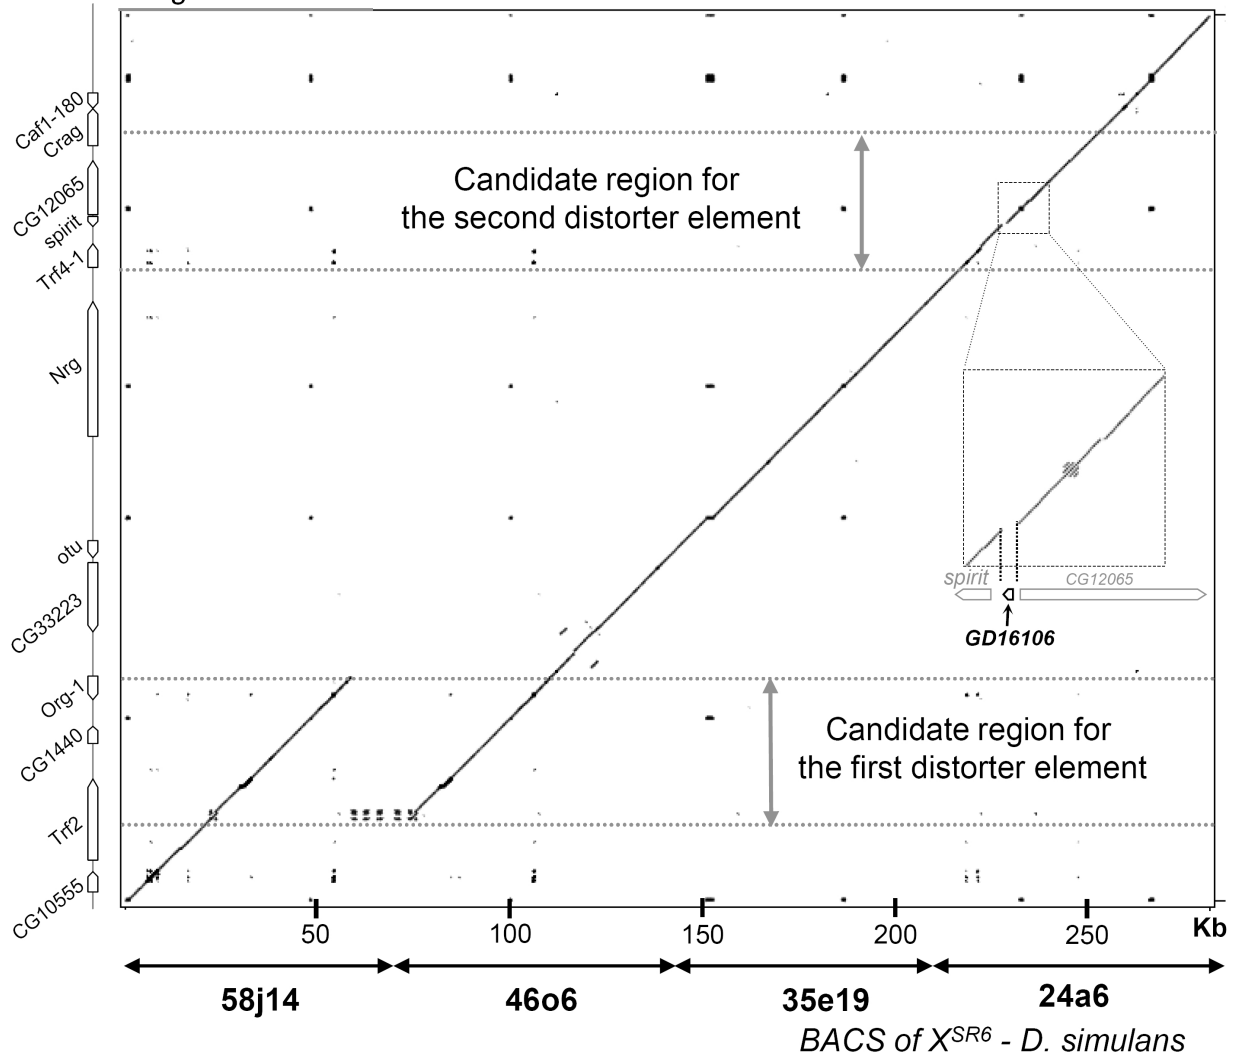

**Figure S2** Dot plot comparison of the *sex-ratio* region on the  $X^{SR6}$  chromosome of *D. simulans* (below) with the homologous region in *D. melanogaster* (left). Boxes along the vertical axis represent the genes annotated in *D. melanogaster* genome. The limits of the candidate region for the second element involved in drive are those determined in Montchamp-Moreau *et al* (2006).
