# Supplementary material for: Sequence Analysis of the Segmental Duplication Responsible for Paris Sex-Ratio Drive in Drosophila simulans
Source: PubMed Central journal article supplement (PMC3276153; doi:10.1534/g3.111.000315), 2011-10-01
Supplement: supp_1.5.401_FigureS3.pdf [file supp_1.5.401_FigureS3.pdf]

| DDSA traces interpretation |          |                       |                                       |
|----------------------------|----------|-----------------------|---------------------------------------|
| Site                       | Position | DDSA type of trace    | Deduction of the neo-synthesized copy |
| 1                          | 5838     | Tandem repeat         | Proximal copy (4606)                  |
| 2                          | 5949     | Micro-homology traces | Proximal copy (4606)                  |
| 3                          | 6198     | Tandem repeat         | Distal copy (58j14)                   |
| 4                          | 6992     | Micro-homology traces | Proximal copy (4606)                  |
| 5                          | 8787     | Micro-homology traces | Proximal copy (4606)                  |

| Legends:              |
|-----------------------|
| tandem repeat         |
| micro-homology traces |

**Site 1: Position: 5838 bp**

```

XSR6d-58j14  CCGGCATTTATCAAACGGCAATGTCG-----GTGGAATCTTTAACTAGAAACAAC
XSR6p-4606  CCGGCATTTATCAAACGGCAATGTCGTGGAAATCGTGTGGAATCTTTAACTAGAAACAAC
*****
Dsim        CCGGCATTTATCAAACGGCAATGTCG-----GTGGAATCTTTAACTAGAAACAAC
Dsec        CCGGCATTTATCAAACGGCAATGTCG-----GTGGAATCTTTAACTAGAAACAAC
Dmel        GAGGCATTTATCAAATCGGCAATGTCG-----GGGGAATCTTCAACTAGAAACAAC

```

**Site 2: Position: 5949 bp**

```

XSR6d-58j14  ATAGATCTCTTTGGCATTAAAT-----GAGTGAAGCTCCTAAATGTACATATGCAATAT
XSR6p-4606  ATAGATCTCTTTGGC-----TCCATAATGTACATATGCAATAT
*****
Dsim        ATAGATCTCTTTGGCATTAAAT-----GAGTGAAGCTCCTAAATGTACATATGCAATAT
Dsec        ATAGATCTCTTTGGCATTAAATTTAAATGAGTGAAGCTCCTAAATGTACATATGCAATAT
Dmel        ATAGATCTTTTTGGCATTAAAT-----GAGTGAAGCTCCTAAACATACATATGCAATAT
Dyak        ATAGACCTTTTTGGTATTAAAT-----GAGAGAAGCTCCTAAATGTACATTTGAAATAT

```

**Site 3: Position: 6198 bp**

```

XSR6d-58j14  TCGATGTTGGTGCATAACTGTTGTTGTTGCATAACTGTTGTTGTTGCTGTTGCTCGATTT
XSR6p-4606  TCGATGTTGGTGCATAACTGTTGTTGTTGCTGTTGCTCGATTT
*****
Dsec        TCGATGTTGGTGCATAACTGTTGTTGTTGCTGTTGCTCGATTT
Dsim        TCGATGTTGGTGCATAACTGTTGTTGTTGCTGTTGCTCGATTT
Dmel        TCGATGTTGGTGCATAACTGTTGTTGTTGCTGTTGCTCGATTT

```

**Site 4: Position: 6992 bp**

```

XSR6d-58j14  AATTTGCGTGTTCTTATTTTCCCAAATGTCAACTTTTCCAAATTATTTATTTACTTTTAT
XSR6p-4606  AATTTACGTGTTCTTATTTTCCCAA-----TTATTTATTTACTTTTAT
*****
Dsim-a      AATTTGCGTGTTCTTATTTTCCCAAATTTCAACTTTTCCAAATTATTTATTTACTTTTAT
Dsim-b      AATTTGCGTGTTCTTATTTTCCCAAATGTCAACTTTTCTAATTATTTATTTACTTTTAT
Dsec        AATTTGCATGTTCTTATTTTCCCAAATGTCAACTTTTCCGATTATTTATTTACTTTTAT
Dmel        AATTTGCATGTTTCTATTTTCCCAAATGTCAACTTTACGA-----TTATTAACTTTAT

```

**Site 5: Position: 8787 bp**

```

XSR6d-58j14  GAGTACCAGGATTCAAATCACGAGTACCAGGACTTGAATCACGAGTATCAGGACTCAACA
XSR6p-4606  GAGTACCAGGATTCAA-----ATCAGGAGTATCAGGACTCAACA
*****
Dsim        GAGTACCAGGATTCAAATCACGAGTACCAGGACTTGAATCACGAGTATCAGGACTCAACA

```

**Figure S3** Signatures of the DDSA model. Several traces of the DDSA model have been detected when aligning the duplicated fragments according to Fiston-Lavier *et al* (2007): XSR6d-58j14 = distal copy on X<sup>SR6</sup>, XSR6p-58j14 = proximal copy on X<sup>SR6</sup>. The stars show the position identical between the copies. Homologous sequences in other species were found in flybase. Dsim: *D. simulans*, Dsec: *D. sechellia*, Dmel: *D. melanogaster*, and Dyak: *D. yakuba*. The positions of sites correspond to those in abscissa of Figure 2.
