# Supplementary material for: Sequence Analysis of the Segmental Duplication Responsible for Paris Sex-Ratio Drive in Drosophila simulans
Source: PubMed Central journal article supplement (PMC3276153; doi:10.1534/g3.111.000315), 2011-10-01
Supplement: supp_1.5.401_FigureS4.pdf [file supp_1.5.401_FigureS4.pdf]

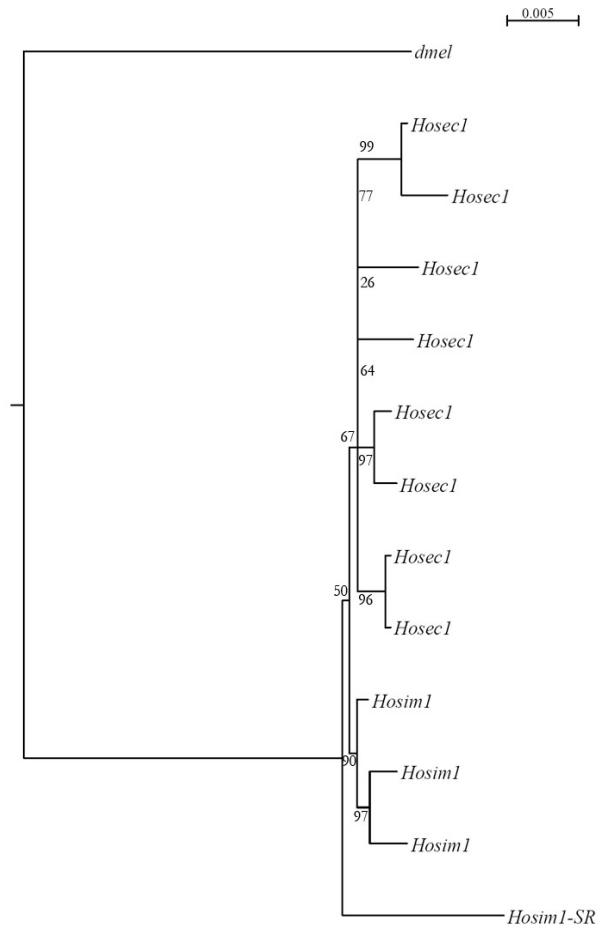

**Figure S4** Maximum likelihood tree of *Hosim1* homologous sequences (HKY85 model) rooted with *D. melanogaster* sequence (*dmel*). *Hosec1*: sequence found in *D. sechellia* (DE FREITAS ORTIZ and LORETO 2009). Numbers are the bootstrap values (100 repetitions).
