# Supplementary material for: Sequence Analysis of the Segmental Duplication Responsible for Paris Sex-Ratio Drive in Drosophila simulans
Source: PubMed Central journal article supplement (PMC3276153; doi:10.1534/g3.111.000315), 2011-10-01
Supplement: supp_1.5.401_FigureS5.pdf [file supp_1.5.401_FigureS5.pdf]

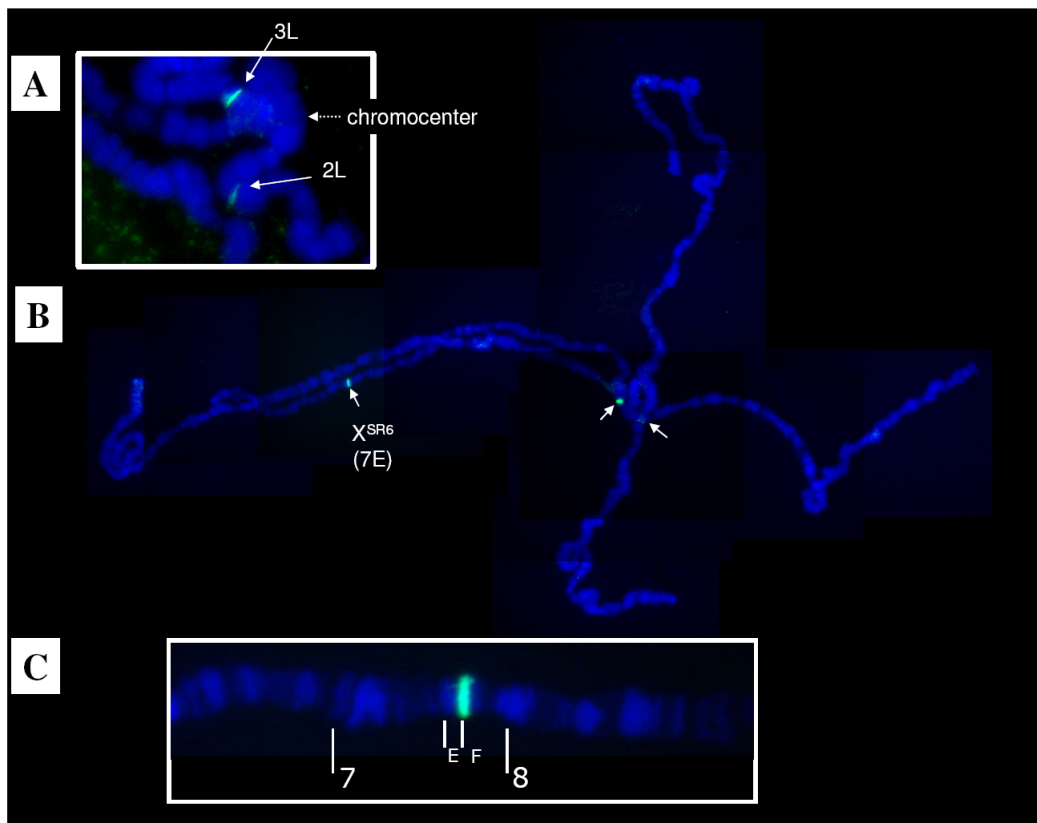

**Figure S5** Visualization of *Hosim1* insertion sites by *in situ* hybridization on polytene chromosomes. (A) Two autosomal pericentromeric sites are visible in  $(X^{ST8})_{ST8}$  males (3L and 2L arms). (B) In  $(X^{SR6})_{ST8}$  males, an additional signal is visible on the  $X^{SR6}$  chromosome. It co-localizes with the supplementary band induced by the duplication (see Figure 2 in Montchamp-Moreau *et al.*, 2006). C. Focus on the  $X^{SR6}$  specific insertion site.
