# Supplementary material for: Sequence Analysis of the Segmental Duplication Responsible for Paris Sex-Ratio Drive in Drosophila simulans
Source: PubMed Central journal article supplement (PMC3276153; doi:10.1534/g3.111.000315), 2011-10-01
Supplement: supp_1.5.401_FigureS6.pdf [file supp_1.5.401_FigureS6.pdf]

A

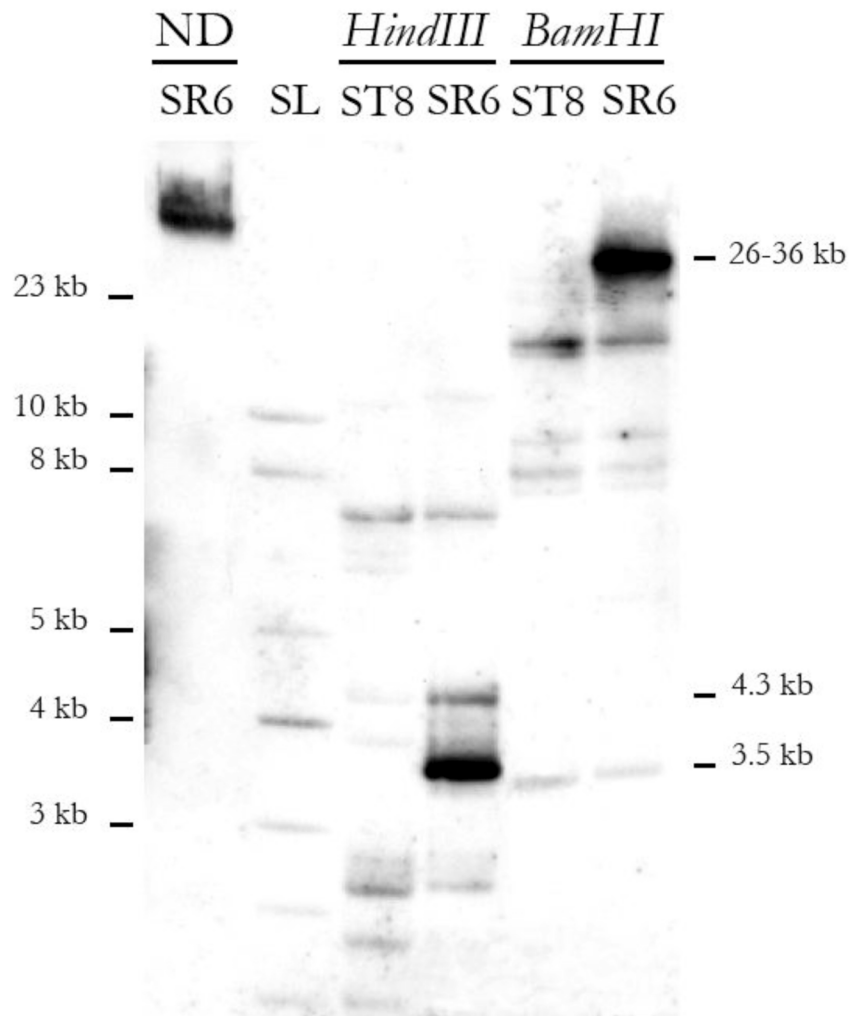

B

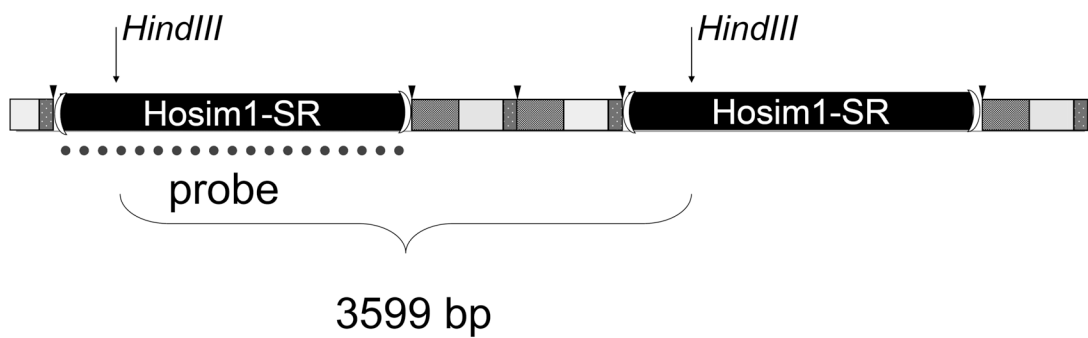

**Figure S6** Control of the organization of the junction region. (A) Southern blot with DNA of  $(X^{SR6})_{ST8}$  males digested with *BamHI* or *HindIII* and probed with *Hosim1-SR*. ND: Non Digested. ST8=  $(X^{ST8})_{ST8}$  males, SR6 =  $(X^{SR6})_{ST8}$  males. SL = Smart Ladder. (B) Position of *Hosim1* probe and *HindIII* sites in the basic module of the junction.
