# Supplementary material for: Sequence Analysis of the Segmental Duplication Responsible for Paris Sex-Ratio Drive in Drosophila simulans
Source: PubMed Central journal article supplement (PMC3276153; doi:10.1534/g3.111.000315), 2011-10-01
Supplement: supp_1.5.401_FigureS7.pdf [file supp_1.5.401_FigureS7.pdf]

```

Hosim1-3L GAGTGTCTAAATGCAAACTACTGCAAAACTGTGCTTAGTGTGGTGGTGGATCGCAAGGAAACTTATCGCGTCACCTTAAAAATAAGCACCCAGCAGCTTTG
Hosim1-2L .....
Hosim1-U .....
Hosim1-SR .....
cDNA .....

Hosim1-3L GAGGAAACAAAGCGCCAAACCAATGAAAGCCGACAGGAAGCAAAATGTAACATAATATTTGATTTATTCATTTAAGTAGGCTTACTAAATTCCTGATT
Hosim1-2L .....
Hosim1-U .....
Hosim1-SR .....
cDNA .....

Hosim1-3L CTTTTAACATAGACTCCTCAGATAATTGGACCCCAACAGCAAGTAATAACTTCGTTCAITTCACGACC---GGCTGCCGGGAAAGCTGAGAAAA
Hosim1-2L .....
Hosim1-U .....
Hosim1-SR .....
cDNA .....

```

**Figure S7** Identification of an intron in *Hosim1-SR*. The shorter cDNA fragment of Figure 8 have been sequenced and aligned with the sequences of *Hosim1* (DE FREITAS ORTIZ and LORETO 2009) and *Hosim1-SR* . Comparing the sequences shows that the sequenced cDNA came from *Hosim1-SR* form. The part highlighted in yellow shows an intron delimited by the characteristic GT-AG nucleotides, which is close to the deletion of 79nt specific of *Hosim1-SR* (Figure 5).
