# Supplementary material for: Sequence Analysis of the Segmental Duplication Responsible for Paris Sex-Ratio Drive in Drosophila simulans
Source: PubMed Central journal article supplement (PMC3276153; doi:10.1534/g3.111.000315), 2011-10-01
Supplement: supp_1.5.401_TableS1.pdf [file supp_1.5.401_TableS1.pdf]

**Table S1 PCR primers used in the study.**

| Locus                       | Name                                | Primers                                                    | Used for                                  | DNA size (bp)                            | cDNA size (bp)                                           |
|-----------------------------|-------------------------------------|------------------------------------------------------------|-------------------------------------------|------------------------------------------|----------------------------------------------------------|
| <i>GAPDH</i>                | GAPDH-q1                            | AAGGCTGGCATTTCGCTGAACG<br>AATTGCGCCCTTGCGGATTATG           | quantification                            | 198                                      | 198                                                      |
|                             | hAT1-F<br>hAT1-R                    | CGCCCCGGATACAAGATGCCCA<br>CTGCAACAAGTGCAGCAACACA           | probe for FISH                            | 850                                      | 850                                                      |
| <i>Hosim1</i>               | Hosim1-q1-F<br>Hosim1-q1-R<br>(c)   | GGAGCTGGCATCTGCAGTTTGT<br>CTGCTCAACGAATGCCTCGCA            | quantification                            | 148                                      | 148                                                      |
|                             | Hosim1ST-q-F<br>Hosim1ST-q-R<br>(b) | TTCACCAAAGTGAACGAACG<br>TAAGTGAACAACGAACGAACG              | quantification                            | 150                                      | 150                                                      |
|                             | hAT2-F<br>hAT2-R<br>(a)             | ATGGCTTCAAACGAAAGCA<br>CATTATCGGAAACACAGCA                 | Length<br>polymorphism                    | Hosim1-ST :<br>784<br>Hosim1-SR :<br>699 | Hosim1-ST :<br>784 and 717<br>Hosim1-SR :<br>699 and 632 |
|                             | Hosimbam-F<br>Hosimbam-R            | GGATCCCCGAGTGCAGGGAAGTT<br>GGATCCGGCACAGAAAATACGCAAGGAAGCA | probe for<br>Southern blot                |                                          |                                                          |
| <i>RPL17</i>                | RPL17-q2-F<br>RPL17-q2-R            | CCCTCCTTTTCGTTTTCGTT<br>GTGTTGTTCGGCACAGTTCAT              | quantification                            | 345                                      | 161                                                      |
| <i>RPII140</i>              | RPII140-q1-F<br>RPII140-q1-R        | ATGGTGGCTTGCGTTTCGGTG<br>ATTGTTGCGCAGATTGGCGATGG           | quantification                            | 158                                      | 158                                                      |
| <i>light</i>                | Light410-F<br>Light535-R            | CCGATTCCAAAGCTCACATT<br>TTGACAAAACACTGCCTTCG               | quantification                            | 194                                      | 126                                                      |
| <i>Trf2</i>                 | DMTRF2-1<br>DMTRF2-2                | GCCATCCATACACCACTGC<br>GAACGTTGCTTGCGGAAA                  | control of cDNA                           | 526                                      | 462                                                      |
| <i>IST</i>                  | motif1-q2-F<br>motif1-q2-R          | AGTTGCCTTTGAGTTTTCTG<br>ACTGATTTTGTTCACCTGACT              | expression of<br><i>rISTs</i>             | 79                                       | 79                                                       |
| junction<br>distal<br>(a)   | jct-F<br>jct-orgLongR2              | GTCACTTGCAGGCAGACAAA<br>TGCGCACTCGGGGTCACGAT               | control of<br>duplication<br>organization | 757                                      | -                                                        |
| junction<br>proximal<br>(c) | hosimSR1768-F<br>jctTRF2-R          | ACATCAGTTCCTTGCGAACGCCT<br>AGAGAGTACGTGCCAGTGTGTA          | control of<br>duplication<br>organization | 1907                                     | -                                                        |
| junction<br>internal<br>(b) | Jct-oranbleu-F<br>hosimSR247-R      | AGGGTACGGCAACGGTCACA<br>TCCTCAAAGCTGCTGGGTGC               | control of<br>duplication<br>organization | 627                                      | -                                                        |
